# Supplementary material for: Plasmon-activated water as a therapeutic strategy in Alzheimer’s disease by altering gut microbiota
Source: publisher site journal article supplement (doi:10.18632/aging.204706), 2023-05-08
Supplement: Supplementary file [file aging-v15i9-204706-supplementary-material-SD1.pdf]

## SUPPLEMENTARY FIGURE

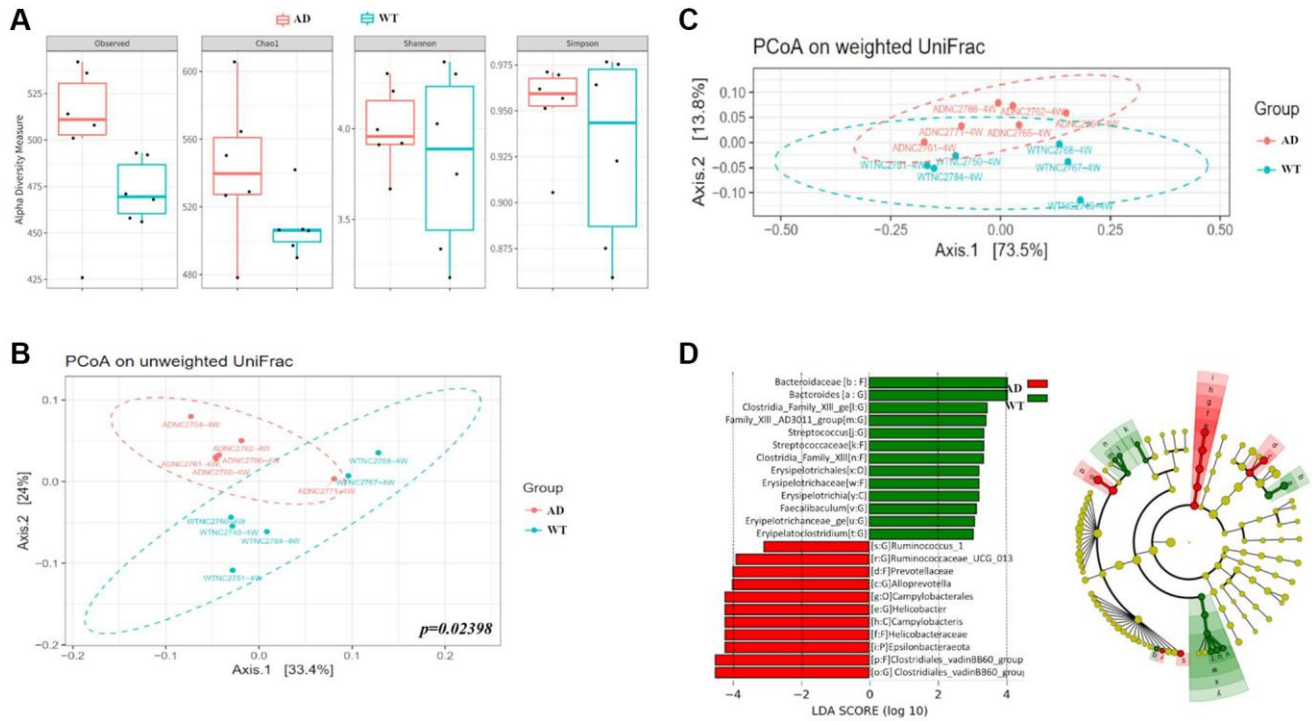

**Supplementary Figure 1. Fecal microbiome distribution analysis in wild-type (WT) and AD mice.** The feces of rats treated with and without plasmon-activated (PAW) was prepared for fecal microbiotic profiling by high-throughput sequencing of the 16s rRNA gene with the Illumina MiSeq system. **(A)** Alpha-diversity of PAW treated samples and untreated controls. Principal coordinate analysis (PCoA) plot based on **(B)** unweighted or **(C)** weight UniFrac distances of omeprazole treated samples and untreated controls. Significant differences in beta-diversity were evaluated with permutational multivariate analysis of variance (vegan::adonis, 1000 permutations) and beta-dispersion was quantified with betadisper (vegan::betadisper, 1000 permutations). Both indices achieved adonis  $p < 0.05$  and betadisper  $p > 0.05$ . **(D)** Linear discriminant analysis (LDA) effect size (LEfSe) analysis of gut microbiotic changes in rats with long-term omeprazole treatment. Significant biomarkers were defined as taxa with an LDA score (log10) of  $\geq 2$ . (b) Significant taxa were highlighted on the cladogram. Abbreviations: P: phylum; C: class; O: order; F: family; G: genus.
