# Supplementary material for: Plasmon-activated water as a therapeutic strategy in Alzheimer’s disease by altering gut microbiota
Source: publisher site journal article supplement (doi:10.18632/aging.204706), 2023-05-08
Supplement: Supplementary file [file aging-v15i9-204706-supplementary-material-SD2.pdf]

## SUPPLEMENTARY TABLES

**Supplementary Table 1. Relative abundance (%) of gut microbiota with water (WT, AD) and PAW-fed (WT+PAW, AD+PAW) mice.**

| Genus                        | AD                | AD+PAW            | WT                | WT+PAW            |
|------------------------------|-------------------|-------------------|-------------------|-------------------|
| Desulfovibrionaceae_ge       | 0.0023% ± 0.0019% | 2.9352% ± 4.6567% | 0.0039% ± 0.0029% | 0.2052% ± 0.3204% |
| Desulfovibrio                | 0.0499% ± 0.0438% | 0.0079% ± 0.0038% | 0.0225% ± 0.0133% | 0.0242% ± 0.0284% |
| Erysipelatoclostridium       | 0.0143% ± 0.0288% | 0.1179% ± 0.1370% | 0.1262% ± 0.0959% | 0.0499% ± 0.0505% |
| Candidatus_Stoquefichus      | 0.0107% ± 0.0161% | 0.0690% ± 0.0681% | 0.0064% ± 0.0067% | 0.0220% ± 0.0252% |
| Allobaculum                  | 0.0011% ± 0.0016% | 1.8756% ± 2.3010% | 0.0011% ± 0.0009% | 0.1375% ± 0.1974% |
| Ruminococcus_1               | 0.1829% ± 0.1388% | 1.2133% ± 1.8986% | 0.0399% ± 0.0404% | 0.0143% ± 0.0233% |
| Akkermansia                  | 0.1055% ± 0.0767% | 1.3044% ± 1.6261% | 0.3007% ± 0.6173% | 0.1414% ± 0.1392% |
| Mucispirillum                | 0.0392% ± 0.0651% | 0.0273% ± 0.0649% | 0.0047% ± 0.0056% | 0.0007% ± 0.0012% |
| Lachnospiraceae_FCS020_group | 0.1033% ± 0.1265% | 0.0312% ± 0.0178% | 0.1182% ± 0.0861% | 0.3206% ± 0.2779% |
| Tyzzereella                  | 0.0393% ± 0.0214% | 0.0152% ± 0.0103% | 0.0170% ± 0.0107% | 0.0304% ± 0.0196% |
| Helicobacter                 | 4.3627% ± 1.4373% | 2.0233% ± 2.2687% | 0.8982% ± 0.5357% | 1.9475% ± 1.4251% |

**Supplementary Table 2. Relative abundance (%) Genus level of wildtype (WT) and AD mice gut microbiota with PAW treatment (WT+PAW, AD+PAW) and fecal microbiota transplantation (WT+FMT, AD+FMT).**

| Genus                        | AD+PAW | AD+FMT | WT+PAW | WT+FMT |
|------------------------------|--------|--------|--------|--------|
| Desulfovibrionaceae_ge       | 4.323% | 3.287% | 1.345% | 2.070% |
| Desulfovibrio                | 0.016% | 0.016% | 0.018% | 0.023% |
| Erysipelatoclostridium       | 0.004% | 0.008% | 0.002% | 0.008% |
| Candidatus_Stoquefichus      | 0.012% | 0.013% | 0.020% | 0.017% |
| Allobaculum                  | 0.192% | 0.073% | 0.912% | 0.087% |
| Ruminococcus_1               | 0.051% | 0.101% | 0.030% | 0.131% |
| Akkermansia                  | 0.383% | 0.094% | 0.155% | 0.897% |
| Mucispirillum                | 0.227% | 0.077% | 0.240% | 0.011% |
| Lachnospiraceae_FCS020_group | 0.003% | 0.001% | 0.013% | 0.002% |
| Tyzzereella                  | 0.237% | 0.089% | 0.067% | 0.043% |
| Helicobacter                 | 0.834% | 0.924% | 0.395% | 0.166% |

**Supplementary Table 3. The standardized uptake value ratio (SUVR) in the cerebellum of each brain region (Mean  $\pm$  SEM) from wildtype (WT) and AD mice fed with water (WT, AD), PAW (WT+PAW, AD+PAW) and FMT (WT+FMT, AD+FMT).**

| Region           | WT                | WT+PAW            | WT+FMT            | AD                | AD+PAW            | AD+FMT            |
|------------------|-------------------|-------------------|-------------------|-------------------|-------------------|-------------------|
| Cortex           | 0.960 $\pm$ 0.024 | 0.967 $\pm$ 0.024 | 0.955 $\pm$ 0.013 | 1.127 $\pm$ 0.046 | 1.044 $\pm$ 0.040 | 1.043 $\pm$ 0.045 |
| Hippocampus      | 1.026 $\pm$ 0.021 | 1.030 $\pm$ 0.019 | 0.962 $\pm$ 0.020 | 1.175 $\pm$ 0.048 | 1.083 $\pm$ 0.031 | 1.024 $\pm$ 0.042 |
| Striatum         | 0.988 $\pm$ 0.017 | 0.993 $\pm$ 0.017 | 1.044 $\pm$ 0.025 | 1.077 $\pm$ 0.029 | 1.045 $\pm$ 0.031 | 1.096 $\pm$ 0.036 |
| Forebrain bundle | 1.008 $\pm$ 0.017 | 1.005 $\pm$ 0.018 | 0.958 $\pm$ 0.023 | 1.147 $\pm$ 0.060 | 1.024 $\pm$ 0.028 | 1.029 $\pm$ 0.034 |

**Supplementary Table 4. The protein concentration (pg/mg) of cytokines extracted from cortex and hippocampus of WT and AD fed with water (WT, AD), PAW (WT+PAW, AD+PAW) and FMT (WT+FMT, AD+FMT) mice were measured by enzyme-linked immunosorbent assay (ELISA) (Mean  $\pm$  SEM).**

| Cytokine      | Region      | WT                         | WT+PAW                     | WT+FMT                    | AD                          | AD+PAW                     | AD+FMT                      |
|---------------|-------------|----------------------------|----------------------------|---------------------------|-----------------------------|----------------------------|-----------------------------|
| IL-6          | Cortex      | 121 $\pm$ 9                | 150 $\pm$ 28               | 156 $\pm$ 27              | 133 $\pm$ 26                | 119 $\pm$ 28               | 110 $\pm$ 9                 |
|               | Hippocampus | 75 $\pm$ 11 <sup>a</sup>   | 62 $\pm$ 25 <sup>a</sup>   | 64 $\pm$ 4 <sup>a</sup>   | 154 $\pm$ 56 <sup>b</sup>   | 74 $\pm$ 8 <sup>a</sup>    | 67 $\pm$ 8 <sup>a</sup>     |
| TNF- $\alpha$ | Cortex      | 238 $\pm$ 34               | 316 $\pm$ 61               | 354 $\pm$ 42              | 179 $\pm$ 79                | 320 $\pm$ 90               | 361 $\pm$ 68                |
|               | Hippocampus | 652 $\pm$ 172 <sup>a</sup> | 87 $\pm$ 50 <sup>b</sup>   | 130 $\pm$ 45 <sup>b</sup> | 688 $\pm$ 150 <sup>a</sup>  | 99 $\pm$ 53 <sup>b</sup>   | 194 $\pm$ 53 <sup>b</sup>   |
| IL-1 $\beta$  | Cortex      | 177 $\pm$ 25 <sup>a</sup>  | 43 $\pm$ 6 <sup>b</sup>    | 54 $\pm$ 10 <sup>b</sup>  | 298 $\pm$ 46 <sup>c</sup>   | 211 $\pm$ 21 <sup>a</sup>  | 220 $\pm$ 41 <sup>a</sup>   |
|               | Hippocampus | 1471 $\pm$ 32 <sup>a</sup> | 783 $\pm$ 146 <sup>b</sup> | 813 $\pm$ 71 <sup>b</sup> | 1595 $\pm$ 147 <sup>a</sup> | 1110 $\pm$ 61 <sup>b</sup> | 1120 $\pm$ 104 <sup>b</sup> |

<sup>a,b,c</sup>Different superscripts within a row (between columns) indicate significant differences between groups ( $p < 0.05$ ).
